# Supplementary material for: Development and validation of an Explainable Machine Learning Model for Predicting Multiple Organ Failure in Patients with Acute Pancreatitis: a Multicenter Cohort Study
Source: Research Square preprint supplement (doi:10.21203/rs.3.rs-8086659/v1), 2025-12-22
Supplement: Supplementary file 2 [file a7f2403b33a5b304ae993e23.docx]

**Initial Data Characteristics Table**:

| Variable | Levels | N | Overall | No MOF | MOF | p-value |
| --- | --- | --- | --- | --- | --- | --- |
|  |  |  | N = 832 | N = 634 | N = 198 |  |
| Age |  | 832 | 57.62 (17.55) | 57.16 (17.58) | 59.09 (17.43) | 0.175 |
| Weight |  | 828 | 87.89 (24.56) | 87.22 (24.26) | 90.04 (25.46) | 0.172 |
|  | (Missing) |  | 4 | 2 | 2 |  |
| HR |  | 832 | 101.50 (21.70) | 101.56 (21.74) | 101.30 (21.65) | 0.882 |
| RR |  | 832 | 21.64 (6.88) | 21.45 (6.65) | 22.23 (7.56) | 0.197 |
| T |  | 828 | 98.52 (1.51) | 98.58 (1.57) | 98.34 (1.28) | 0.028 |
|  | (Missing) |  | 4 | 2 | 2 |  |
| HCT |  | 826 | 33.81 (7.45) | 34.56 (7.18) | 31.44 (7.81) | <0.001 |
|  | (Missing) |  | 6 | 6 | 0 |  |
| Hb |  | 827 | 11.19 (2.54) | 11.48 (2.48) | 10.27 (2.52) | <0.001 |
|  | (Missing) |  | 5 | 4 | 1 |  |
| PLT |  | 829 | 212.81 (128.44) | 221.96 (130.15) | 183.66 (118.53) | <0.001 |
|  | (Missing) |  | 3 | 3 | 0 |  |
| RDW |  | 828 | 15.14 (2.28) | 14.82 (1.87) | 16.16 (3.04) | <0.001 |
|  | (Missing) |  | 4 | 3 | 1 |  |
| RBC |  | 829 | 3.66 (0.87) | 3.77 (0.84) | 3.32 (0.90) | <0.001 |
|  | (Missing) |  | 3 | 3 | 0 |  |
| WBC |  | 827 | 14.47 (8.26) | 14.05 (7.61) | 15.83 (9.95) | 0.022 |
|  | (Missing) |  | 5 | 5 | 0 |  |
| Alb |  | 718 | 2.84 (0.63) | 2.88 (0.62) | 2.75 (0.63) | 0.015 |
|  | (Missing) |  | 114 | 103 | 11 |  |
| AG |  | 830 | 16.00 (5.32) | 15.18 (4.81) | 18.64 (5.98) | <0.001 |
|  | (Missing) |  | 2 | 2 | 0 |  |
| Ca |  | 830 | 7.86 (1.14) | 7.90 (1.08) | 7.72 (1.29) | 0.070 |
|  | (Missing) |  | 2 | 2 | 0 |  |
| Cl |  | 830 | 103.89 (7.27) | 104.37 (6.59) | 102.36 (8.95) | 0.004 |
|  | (Missing) |  | 2 | 2 | 0 |  |
| Glu |  | 830 | 159.54 (114.09) | 159.64 (111.61) | 159.22 (121.96) | 0.966 |
|  | (Missing) |  | 2 | 2 | 0 |  |
| K |  | 829 | 4.18 (0.86) | 4.13 (0.86) | 4.34 (0.85) | 0.002 |
|  | (Missing) |  | 3 | 3 | 0 |  |
| Na |  | 830 | 137.91 (6.02) | 138.04 (5.47) | 137.51 (7.51) | 0.359 |
|  | (Missing) |  | 2 | 2 | 0 |  |
| LAC |  | 702 | 2.56 (2.33) | 2.28 (1.95) | 3.37 (3.04) | <0.001 |
|  | (Missing) |  | 130 | 113 | 17 |  |
| PCO2 |  | 653 | 40.52 (11.40) | 40.23 (10.83) | 41.32 (12.79) | 0.316 |
|  | (Missing) |  | 179 | 158 | 21 |  |
| PH |  | 686 | 7.33 (0.11) | 7.35 (0.11) | 7.30 (0.12) | <0.001 |
|  | (Missing) |  | 146 | 126 | 20 |  |
| PO2 |  | 832 | 100.47 (77.84) | 107.62 (79.10) | 77.54 (68.99) | <0.001 |
| INR |  | 791 | 1.55 (0.93) | 1.36 (0.58) | 2.14 (1.41) | <0.001 |
|  | (Missing) |  | 41 | 40 | 1 |  |
| PT |  | 791 | 16.92 (9.46) | 14.96 (5.98) | 22.82 (14.36) | <0.001 |
|  | (Missing) |  | 41 | 40 | 1 |  |
| PTT |  | 783 | 35.48 (17.73) | 33.03 (14.40) | 42.84 (23.81) | <0.001 |
|  | (Missing) |  | 49 | 46 | 3 |  |
| ALT |  | 799 | 217.72 (822.79) | 163.08 (595.52) | 390.48 (1,289.85) | 0.019 |
|  | (Missing) |  | 33 | 27 | 6 |  |
| AST |  | 809 | 364.98 (1,465.29) | 249.94 (957.77) | 724.75 (2,417.83) | 0.008 |
|  | (Missing) |  | 23 | 21 | 2 |  |
| BIL |  | 810 | 3.10 (5.91) | 1.94 (3.11) | 6.77 (9.89) | <0.001 |
|  | (Missing) |  | 22 | 18 | 4 |  |
| Cr |  | 832 | 1.71 (1.77) | 1.34 (1.50) | 2.91 (2.01) | <0.001 |
| BUN |  | 829 | 28.38 (25.65) | 23.35 (21.84) | 44.42 (30.02) | <0.001 |
|  | (Missing) |  | 3 | 3 | 0 |  |
| LDH |  | 709 | 581.59 (982.38) | 503.75 (680.34) | 800.48 (1,523.82) | 0.011 |
|  | (Missing) |  | 123 | 111 | 12 |  |
| Nbps |  | 832 | 126.51 (26.37) | 130.58 (24.59) | 113.48 (27.70) | <0.001 |
| Gender |  | 832 |  |  |  | 0.455 |
|  | Female |  | 351.00 (42.19%) | 272.00 (42.90%) | 79.00 (39.90%) |  |
|  | Male |  | 481.00 (57.81%) | 362.00 (57.10%) | 119.00 (60.10%) |  |
| Race |  | 832 |  |  |  | 0.322 |
|  | Asian |  | 28.00 (3.37%) | 20.00 (3.15%) | 8.00 (4.04%) |  |
|  | Black |  | 76.00 (9.13%) | 59.00 (9.31%) | 17.00 (8.59%) |  |
|  | Other |  | 214.00 (25.72%) | 154.00 (24.29%) | 60.00 (30.30%) |  |
|  | White |  | 514.00 (61.78%) | 401.00 (63.25%) | 113.00 (57.07%) |  |
| HTN |  | 832 |  |  |  | <0.001 |
|  | 0 |  | 446.00 (53.61%) | 317.00 (50.00%) | 129.00 (65.15%) |  |
|  | 1 |  | 386.00 (46.39%) | 317.00 (50.00%) | 69.00 (34.85%) |  |
| LC |  | 832 |  |  |  | <0.001 |
|  | 0 |  | 735.00 (88.34%) | 598.00 (94.32%) | 137.00 (69.19%) |  |
|  | 1 |  | 97.00 (11.66%) | 36.00 (5.68%) | 61.00 (30.81%) |  |
| HEP |  | 832 |  |  |  | <0.001 |
|  | 0 |  | 713.00 (85.70%) | 570.00 (89.91%) | 143.00 (72.22%) |  |
|  | 1 |  | 119.00 (14.30%) | 64.00 (10.09%) | 55.00 (27.78%) |  |
| PTB |  | 832 |  |  |  | 0.306 |
|  | 0 |  | 806.00 (96.88%) | 612.00 (96.53%) | 194.00 (97.98%) |  |
|  | 1 |  | 26.00 (3.13%) | 22.00 (3.47%) | 4.00 (2.02%) |  |
| PNA |  | 832 |  |  |  | 0.031 |
|  | 0 |  | 620.00 (74.52%) | 484.00 (76.34%) | 136.00 (68.69%) |  |
|  | 1 |  | 212.00 (25.48%) | 150.00 (23.66%) | 62.00 (31.31%) |  |
| CKD |  | 832 |  |  |  | <0.001 |
|  | 0 |  | 720.00 (86.54%) | 566.00 (89.27%) | 154.00 (77.78%) |  |
|  | 1 |  | 112.00 (13.46%) | 68.00 (10.73%) | 44.00 (22.22%) |  |
| T1DM |  | 832 |  |  |  | 0.834 |
|  | 0 |  | 818.00 (98.32%) | 623.00 (98.26%) | 195.00 (98.48%) |  |
|  | 1 |  | 14.00 (1.68%) | 11.00 (1.74%) | 3.00 (1.52%) |  |
| HLD |  | 832 |  |  |  | 0.576 |
|  | 0 |  | 592.00 (71.15%) | 448.00 (70.66%) | 144.00 (72.73%) |  |
|  | 1 |  | 240.00 (28.85%) | 186.00 (29.34%) | 54.00 (27.27%) |  |
| CB |  | 832 |  |  |  | <0.001 |
|  | 0 |  | 794.00 (95.43%) | 615.00 (97.00%) | 179.00 (90.40%) |  |
|  | 1 |  | 38.00 (4.57%) | 19.00 (3.00%) | 19.00 (9.60%) |  |
| HF |  | 832 |  |  |  | 0.024 |
|  | 0 |  | 702.00 (84.38%) | 545.00 (85.96%) | 157.00 (79.29%) |  |
|  | 1 |  | 130.00 (15.63%) | 89.00 (14.04%) | 41.00 (20.71%) |  |
| MI |  | 832 |  |  |  | 0.486 |
|  | 0 |  | 801.00 (96.27%) | 612.00 (96.53%) | 189.00 (95.45%) |  |
|  | 1 |  | 31.00 (3.73%) | 22.00 (3.47%) | 9.00 (4.55%) |  |
| IHD |  | 832 |  |  |  | <0.001 |
|  | 0 |  | 677.00 (81.37%) | 532.00 (83.91%) | 145.00 (73.23%) |  |
|  | 1 |  | 155.00 (18.63%) | 102.00 (16.09%) | 53.00 (26.77%) |  |
| COPD |  | 832 |  |  |  | 0.008 |
|  | 0 |  | 751.00 (90.26%) | 582.00 (91.80%) | 169.00 (85.35%) |  |
|  | 1 |  | 81.00 (9.74%) | 52.00 (8.20%) | 29.00 (14.65%) |  |
| is_icu_dead |  | 832 |  |  |  | <0.001 |
|  | 0 |  | 718.00 (86.30%) | 570.00 (89.91%) | 148.00 (74.75%) |  |
|  | 1 |  | 114.00 (13.70%) | 64.00 (10.09%) | 50.00 (25.25%) |  |
| Ventilation |  | 832 |  |  |  | <0.001 |
|  | 0 |  | 142.00(17.07%) | 124.00(19.56%) | 18.00(9.10%) |  |
|  | 1 |  | 690.00 (82.93%) | 510.00 (80.44%) | 180.00 (90.90%) |  |
| VP |  | 832 |  |  |  | <0.001 |
|  | 0 |  | 443.00 (53.25%) | 386.00 (60.88%) | 57.00 (28.79%) |  |
|  | 1 |  | 389.00 (46.75%) | 248.00 (39.12%) | 141.00 (71.21%) |  |
| GC |  | 832 |  |  |  | <0.001 |
|  | 0 |  | 674.00 (81.01%) | 535.00 (84.38%) | 139.00 (70.20%) |  |
|  | 1 |  | 158.00 (18.99%) | 99.00 (15.62%) | 59.00 (29.80%) |  |
| ABX |  | 832 |  |  |  | <0.001 |
|  | 0 |  | 118.00 (14.18%) | 113.00 (17.82%) | 5.00 (2.53%) |  |
|  | 1 |  | 714.00 (85.82%) | 521.00 (82.18%) | 193.00 (97.47%) |  |

Continuous variables are represented by mean (SD), while categorical variables are expressed as frequency counts with percentages.
